# Supplementary material for: Tuning of hole carrier density in p-type α-SnWO4 by exploiting oxygen defects
Source: Royal Society of Chemistry journal article supplement (doi:10.1039/d2ma00815g), 2022-01-01
Supplement: d2ma00815g1.pdf [file d2ma00815g1.pdf]

## **Electronic Supplemental Information (ESI): Tuning of Hole Carrier Density in p-type $\alpha$ -SnWO<sub>4</sub> by Exploiting Oxygen Defects**

Makoto Minohara,<sup>\*a</sup> Yuka Dobashi,<sup>a,b</sup> Naoto Kikuchi,<sup>a</sup> Akane Samizo,<sup>b</sup> Takashi Honda,<sup>c,d</sup> Xinyi He,<sup>e</sup> Takayoshi Katase,<sup>e</sup> Toshio Kamiya,<sup>e</sup> Keishi Nishio<sup>b</sup> and Yoshihiro Aiura<sup>a</sup>

<sup>a</sup>*Research Institute for Advanced Electronics and Photonics, National Institute of Advanced Industrial Science and Technology (AIST), Tsukuba, Ibaraki 305-8568, Japan*

<sup>b</sup>*Department of Materials Science and Technology, Tokyo University of Science, Katsushika, Tokyo 125-8585, Japan*

<sup>c</sup>*Materials & Life Science Division, J-PARC Centre, Tokai, Ibaraki 319-1195, Japan*

<sup>d</sup>*Institute of Materials Structure Science, High Energy Accelerator Research Organization (KEK), Tsukuba, Ibaraki 305-0801, Japan*

<sup>e</sup>*Laboratory for Materials and Structures, Institute of Innovative Research, Tokyo Institute of Technology, 4259 Nagatsuta, Midori, Yokohama 226-8503, Japan*

\* Corresponding author: [m-minohara@aist.go.jp](mailto:m-minohara@aist.go.jp)

This PDF file includes:

Figures S1 to S6

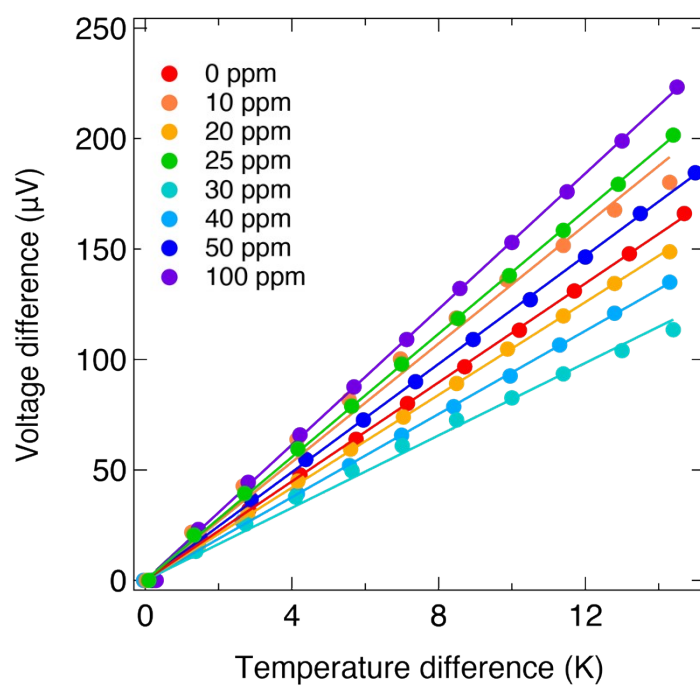

**Figure S1.** Thermopower versus temperature difference for  $\alpha$ -SnWO<sub>4</sub> samples.

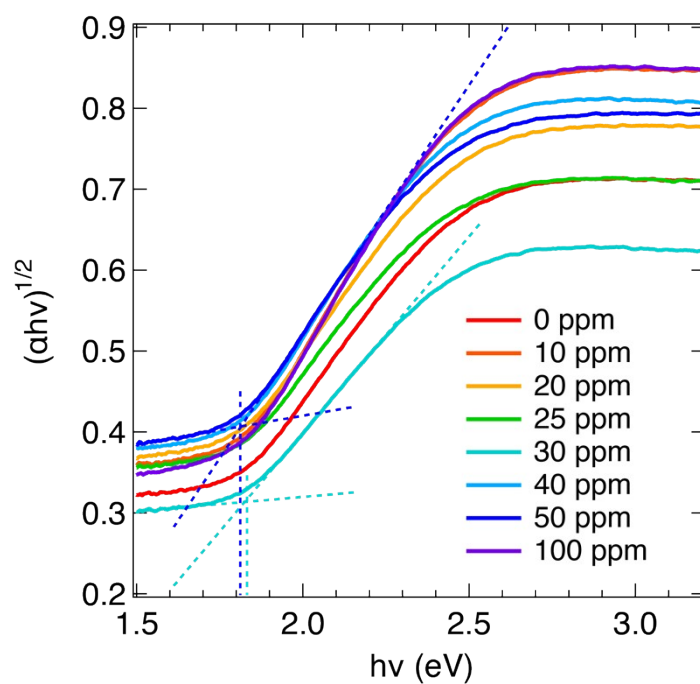

**Figure S2.** Optical band gaps of  $\alpha$ -SnWO<sub>4</sub> samples.

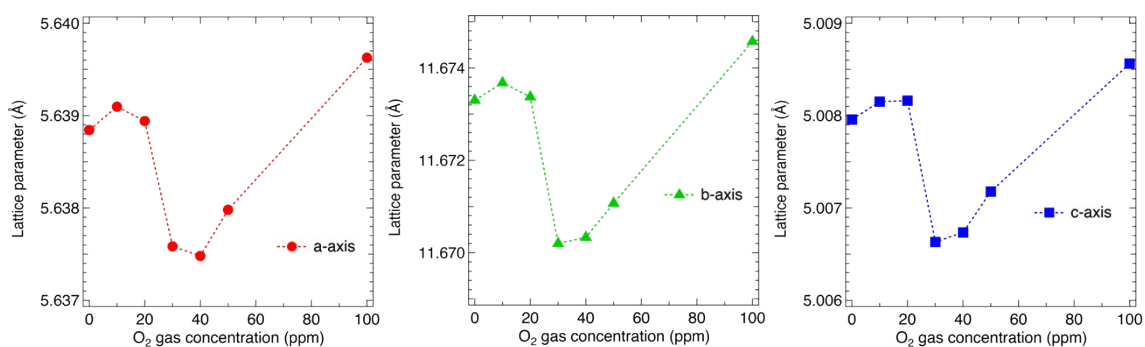

**Figure S3.** Lattice constants of  $\alpha$ -SnWO<sub>4</sub> samples.

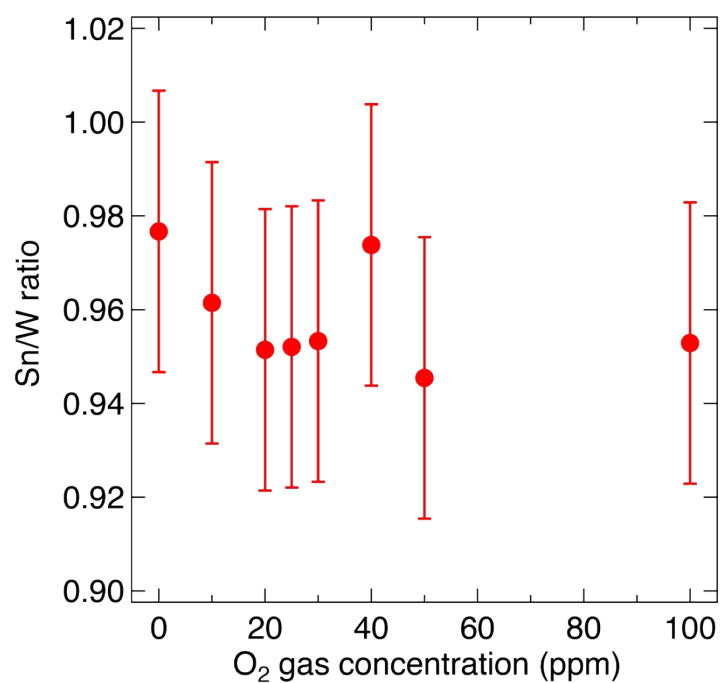

**Figure S4.** Sn/W ratios of  $\alpha$ -SnWO<sub>4</sub> samples evaluated using X-ray fluorescence measurements.

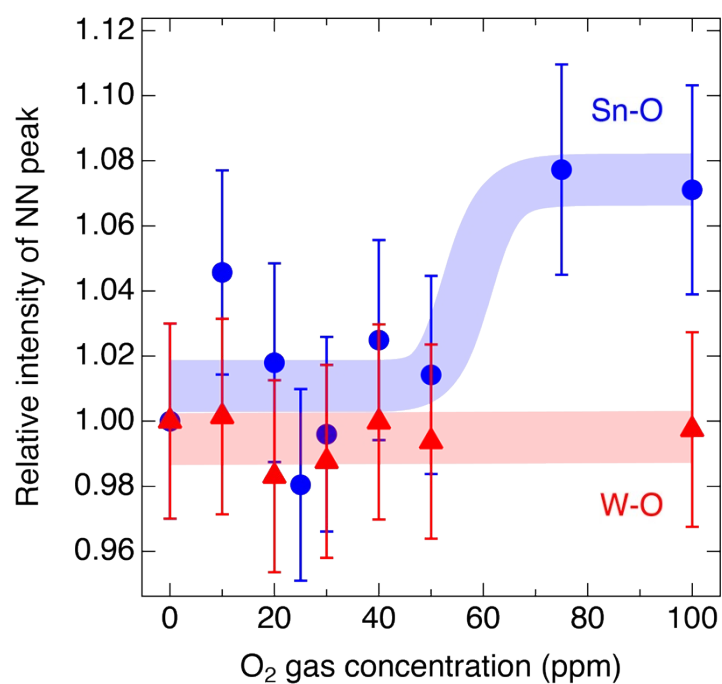

**Figure S5.** Plots of intensities of Sn–O and W–O peaks in Sn *K*- and W *L*<sub>3</sub>-edge EXAFS spectra of  $\alpha$ -SnWO<sub>4</sub> samples, respectively.

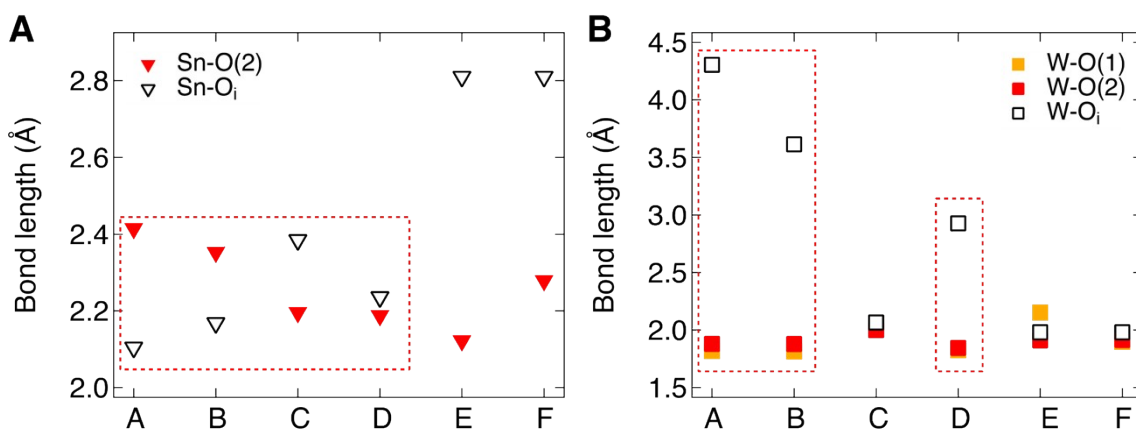

**Figure S6.** Bond lengths of (A) Sn–O(2) and O<sub>i</sub>, (B) W–O(1), O(2), and O<sub>i</sub> of candidate structures shown in Fig. 4.
